# Supplementary material for: Designing C6N6/C2N van der Waals heterostructures for photogenerated charge carrier separation
Source: Royal Society of Chemistry journal article supplement (doi:10.1039/d0cp06670b), 2021-01-01
Supplement: d0cp06670b1.pdf [file d0cp06670b1.pdf]

## Supplementary Materials

### Designing C<sub>6</sub>N<sub>6</sub>/C<sub>2</sub>N van der Waals heterostructures for photogenerated charge carrier separation

Moumita Mukherjee, Rajkumar Jana, Ayan Datta\*

*School of Chemical Sciences, Indian Association for the Cultivation of Science, Jadavpur,  
Kolkata, West Bengal, India-700032*

\*Corresponding Author, E-mail: [spad@iacs.res.in](mailto:spad@iacs.res.in)

#### S1. Cell parameters of C<sub>6</sub>N<sub>6</sub>/C<sub>2</sub>N heterostructure [(2 × 2)/(√3 × √3)]

$$a = b = 14.32 \text{ \AA}$$

$$c = 20 \text{ \AA}$$

$$\alpha = \beta = 90^\circ$$

$$\gamma = 120^\circ$$

#### S2. Crystallographic Information File (.CIF) of C<sub>6</sub>N<sub>6</sub>/C<sub>2</sub>N heterostructure

|     |                    |                    |                    |
|-----|--------------------|--------------------|--------------------|
| N1  | 0.0956899970000009 | 0.2041299939999988 | 0.4399499889999987 |
| N2  | 0.0956600009999988 | 0.3704000119999975 | 0.4478499889999981 |
| N3  | 0.2620800139999986 | 0.3704000119999975 | 0.4476400020000000 |
| N4  | 0.3731999990000006 | 0.0928300019999995 | 0.4478400050000033 |
| N5  | 0.2069800049999984 | 0.0928800029999977 | 0.4397099910000009 |
| N6  | 0.3732100129999978 | 0.2592400010000020 | 0.4478400050000033 |
| N7  | 0.5956900119999986 | 0.2040300070000001 | 0.4525899890000034 |
| N8  | 0.5957000260000029 | 0.3705799880000029 | 0.4528200029999994 |
| N9  | 0.7622500060000021 | 0.3705799880000029 | 0.4529100060000033 |
| N10 | 0.8731799720000026 | 0.0928599980000016 | 0.4403400120000001 |
| N11 | 0.7069500090000034 | 0.0928400009999990 | 0.4482200149999969 |
| N12 | 0.8733599780000034 | 0.2592700120000018 | 0.4478999970000004 |
| N13 | 0.0956500019999993 | 0.7041400069999995 | 0.4480499920000014 |
| N14 | 0.0957000029999975 | 0.8703399899999980 | 0.4399600030000030 |
| N15 | 0.2620700000000014 | 0.8705400229999967 | 0.4477399889999987 |
| N16 | 0.3733899890000032 | 0.5928800109999983 | 0.4526200000000031 |
| N17 | 0.2068500069999999 | 0.5928800109999983 | 0.4524100120000014 |

|     |                    |                    |                    |
|-----|--------------------|--------------------|--------------------|
| N18 | 0.3733899890000032 | 0.7594299909999975 | 0.4526999890000027 |
| N19 | 0.5957999829999991 | 0.7041299939999988 | 0.4483200009999990 |
| N20 | 0.5957900289999998 | 0.8705400229999967 | 0.4482299980000022 |
| N21 | 0.7619500160000001 | 0.8703600170000030 | 0.4406499859999968 |
| N22 | 0.8733699920000007 | 0.5929800270000030 | 0.4481700059999980 |
| N23 | 0.7069600219999970 | 0.5929899810000023 | 0.4484899939999991 |
| N24 | 0.8731700180000033 | 0.7590799930000003 | 0.4403299989999994 |
| N25 | 0.2107599969999967 | 0.4291499850000022 | 0.6049500109999997 |
| N26 | 0.1012799960000024 | 0.5393599869999974 | 0.6041399839999997 |
| N27 | 0.0977199969999987 | 0.2029500009999978 | 0.6185700300000008 |
| N28 | 0.2079000029999989 | 0.0927399990000026 | 0.6183999779999994 |
| N29 | 0.5443699960000004 | 0.0963200030000024 | 0.6042600270000023 |
| N30 | 0.4341599939999981 | 0.2058099959999993 | 0.6050199869999986 |
| N31 | 0.2107799950000029 | 0.7590600249999966 | 0.6049600240000004 |
| N32 | 0.4304899870000014 | 0.8685399889999985 | 0.6043599839999985 |
| N33 | 0.0977500010000014 | 0.8723700050000005 | 0.6186000109999981 |
| N34 | 0.5407400129999971 | 0.7591000199999982 | 0.6054999830000014 |
| N35 | 0.5443699960000004 | 0.4255099889999983 | 0.6045399899999992 |
| N36 | 0.7671499850000032 | 0.8723999859999978 | 0.6192600130000017 |
| N37 | 0.7640500070000016 | 0.5357300040000013 | 0.6054999830000014 |
| N38 | 0.4304899870000014 | 0.5394099949999998 | 0.6044800279999976 |
| N39 | 0.8734999899999991 | 0.4254800080000010 | 0.6044300200000023 |
| N40 | 0.8773400190000018 | 0.0927999990000004 | 0.6189900039999969 |
| N41 | 0.7640600200000023 | 0.2057799990000007 | 0.6052100060000001 |
| N42 | 0.8773699999999991 | 0.7621799710000019 | 0.6190999749999975 |
| C1  | 0.0459299979999983 | 0.2624000010000032 | 0.4432800109999988 |
| C2  | 0.2039400040000032 | 0.4205299910000022 | 0.4491600099999999 |
| C3  | 0.2037599980000024 | 0.2623899880000025 | 0.4431099889999999 |
| C4  | 0.2652199859999982 | 0.0430999989999989 | 0.4431200029999971 |
| C5  | 0.2652300000000025 | 0.2009299990000031 | 0.4431000049999980 |
| C6  | 0.4233300089999972 | 0.2011100049999968 | 0.4492900070000019 |
| C7  | 0.5459899900000025 | 0.2624500100000020 | 0.4526700079999983 |
| C8  | 0.7038300039999967 | 0.4202800099999990 | 0.4529300029999987 |
| C9  | 0.7038199899999995 | 0.2624500100000020 | 0.4527699949999970 |
| C10 | 0.7651799920000002 | 0.0431100019999988 | 0.4436799879999995 |
| C11 | 0.7651100160000013 | 0.2011200040000034 | 0.4494900110000017 |
| C12 | 0.9229999780000000 | 0.2009399980000026 | 0.4434100089999973 |
| C13 | 0.0459299979999983 | 0.7623500230000033 | 0.4433999959999966 |
| C14 | 0.2037599980000024 | 0.9201800230000003 | 0.4431599970000022 |

|     |                    |                    |                    |
|-----|--------------------|--------------------|--------------------|
| C15 | 0.2039400040000032 | 0.7622900009999967 | 0.4492799940000012 |
| C16 | 0.2652800079999977 | 0.5431799890000022 | 0.4524900019999976 |
| C17 | 0.2652699949999970 | 0.7009999750000020 | 0.4525499940000017 |
| C18 | 0.4230900109999993 | 0.7009999750000020 | 0.4527499969999980 |
| C19 | 0.5456900000000005 | 0.7622900009999967 | 0.4496600029999982 |
| C20 | 0.7037199740000020 | 0.9201800230000003 | 0.4437800050000007 |
| C21 | 0.7037199740000020 | 0.7623500230000033 | 0.4438500110000021 |
| C22 | 0.7651200290000020 | 0.5428799990000002 | 0.4497399930000014 |
| C23 | 0.7651799920000002 | 0.7008799910000008 | 0.4438000020000032 |
| C24 | 0.9229999780000000 | 0.7008799910000008 | 0.4435499909999976 |
| C25 | 0.0448199989999978 | 0.5902799959999996 | 0.6048600080000028 |
| C26 | 0.0463799979999990 | 0.7650200129999973 | 0.6152099970000009 |
| C27 | 0.0448100010000019 | 0.4319800139999970 | 0.6048099989999969 |
| C28 | 0.0463499990000003 | 0.2588900029999976 | 0.6151400210000020 |
| C29 | 0.1034699980000013 | 0.3732500079999994 | 0.6083899739999978 |
| C30 | 0.1034900020000009 | 0.7077000139999967 | 0.6084399820000002 |
| C31 | 0.2049999979999981 | 0.2588900029999976 | 0.6150199770000029 |
| C32 | 0.3782599869999999 | 0.2572399969999992 | 0.6084300280000008 |
| C33 | 0.3795700069999981 | 0.4320299919999968 | 0.6049399970000024 |
| C34 | 0.3782599869999999 | 0.0985099970000007 | 0.6083400249999968 |
| C35 | 0.4370000059999981 | 0.0398500000000013 | 0.6047899719999990 |
| C36 | 0.2638700010000008 | 0.0413799990000001 | 0.6149500009999969 |
| C37 | 0.2638500030000017 | 0.2000299990000016 | 0.6149899959999985 |
| C38 | 0.4370000059999981 | 0.3745999929999968 | 0.6049799919999970 |
| C39 | 0.2621999979999998 | 0.3732700050000020 | 0.6083800199999985 |
| C40 | 0.7126899960000017 | 0.0985099970000007 | 0.6086999770000006 |
| C41 | 0.7699999809999980 | 0.0414099990000025 | 0.6155199999999965 |
| C42 | 0.5952900050000025 | 0.0398500000000013 | 0.6050299999999993 |
| C43 | 0.3795799909999999 | 0.9250100260000025 | 0.6048200130000012 |
| C44 | 0.2622199950000024 | 0.8664100169999998 | 0.6083499790000033 |
| C45 | 0.5378800029999979 | 0.9250199789999982 | 0.6050999759999982 |
| C46 | 0.7111600039999999 | 0.9236999749999981 | 0.6156399850000014 |
| C47 | 0.7111600039999999 | 0.7650499940000017 | 0.6157299879999982 |
| C48 | 0.5378699899999972 | 0.5903199910000012 | 0.6052700279999996 |
| C49 | 0.7126899960000017 | 0.5916900040000002 | 0.6089800000000025 |
| C50 | 0.7700200080000030 | 0.7061899899999986 | 0.6157000059999973 |
| C51 | 0.5966799859999981 | 0.7077299950000011 | 0.6089699859999982 |
| C52 | 0.5952900050000025 | 0.5328999760000031 | 0.6053000089999969 |
| C53 | 0.5966799859999981 | 0.8664600250000021 | 0.6088899969999986 |

|     |                    |                    |                    |
|-----|--------------------|--------------------|--------------------|
| C54 | 0.8714100119999983 | 0.5916699770000022 | 0.6087800259999980 |
| C55 | 0.9299700259999995 | 0.3745799960000014 | 0.6049399970000024 |
| C56 | 0.9286500219999994 | 0.2000499959999971 | 0.6153100129999984 |
| C57 | 0.9299799799999988 | 0.5328599810000014 | 0.6050199869999986 |
| C58 | 0.9286699889999994 | 0.7061700220000020 | 0.6154400109999969 |
| C59 | 0.8713999989999976 | 0.2572300140000010 | 0.6086000199999972 |
| C60 | 0.2050299940000002 | 0.9236699940000008 | 0.6150000100000028 |

### S3. AIMD plot of $C_6N_6/C_2N$ heterostructures

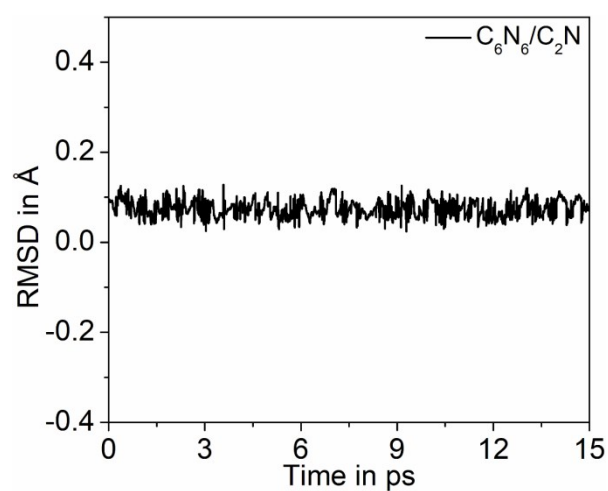

**Figure S1.** Plot of RMSD with time at 300 K for  $C_6N_6/C_2N$  heterostructure.

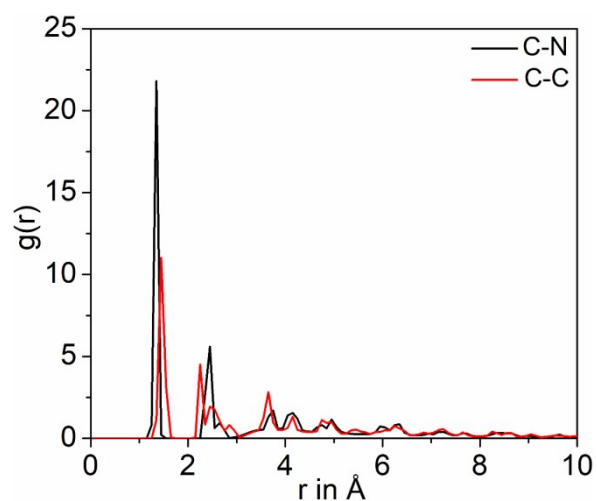

**Figure S2.** Plot of radial distribution function  $\{g(r)\}$  between C-N pair for  $C_6N_6/C_2N$  heterostructure at 300 K.
